# Supplementary material for: Top-down curing to construct self-retaining and moisture-pumping double-layered dressing with enhanced antibacterial, hemostatic, and wound healing performances
Source: Royal Society of Chemistry journal article supplement (doi:10.1039/d4nr04613g), 2025-01-01
Supplement: d4nr04613g1.pdf [file d4nr04613g1.pdf]

Supplementary Information

**Top-down Curing to Construct Self-retaining and Moisture-Pumping  
Double-layered Dressing with Enhanced Antibacterial, Hemostatic, and  
Wound Healing Performances**

Hao Yang<sup>1#</sup>, Yi Zhuang<sup>1</sup>, Yulin Jiang<sup>1</sup>, Huilun Xu<sup>1</sup>, Zheng Liu<sup>1</sup>, Yubao Li<sup>1</sup>, Shuyu Zhang<sup>1</sup>, Tao Guo<sup>2</sup>,  
Lin Qi<sup>1\*</sup> and Li Zhang<sup>1\*</sup>

1. Analytical & Testing Center; West China School of Basic Medical Sciences & Forensic Medicine, Sichuan University, Chengdu 610064, China
2. Department of Orthopedic Surgery, Guizhou Provincial People's Hospital, Guizhou 550002, China

Correspondence to: [zhangli9111@126.com](mailto:zhangli9111@126.com) (Li Zhang); [qilin9367@163.com](mailto:qilin9367@163.com) (Lin Qi)

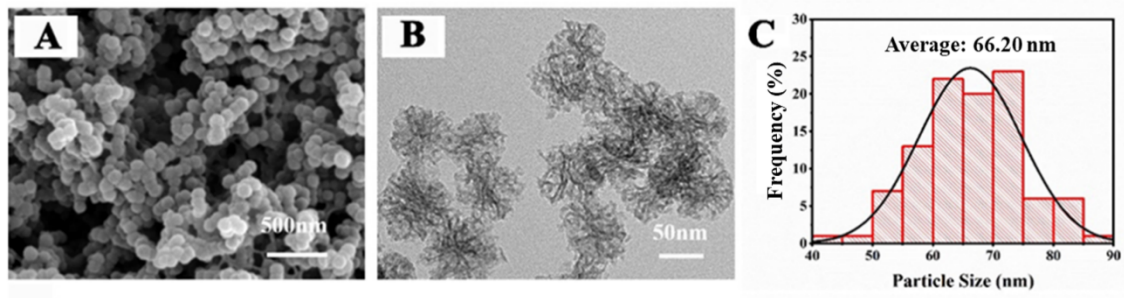

**Fig S1.** The SEM (A), TEM (B), and diameter distribution of MBG nanoparticles (C).

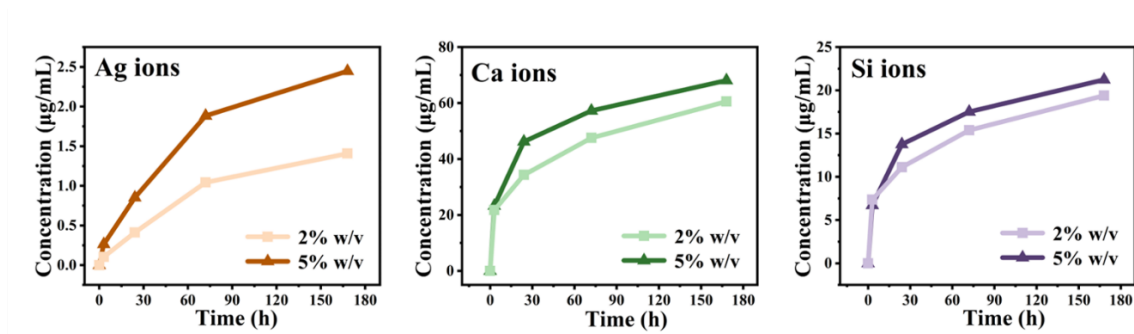

**Fig S2.** ICP-MS measuring the releasing profiles of Ag, Ca, Si ions in AA hydrogel containing 2% w/v and 5% w/v Ag-MBG.
